# Supplementary material for: ANGPTL4, a direct target of hsa-miR-133a-3p, accelerates lung adenocarcinoma lipid metabolism, proliferation and invasion
Source: Aging (Albany NY). 2023 Dec 29;16(9):8348–60. doi: 10.18632/aging.205313 (PMC11132016; doi:10.18632/aging.205313)
Supplement: Supplementary Figure 1 [file aging-16-205313-s001.pdf]

SUPPLEMENTARY FIGURE

| Predicted consequential pairing of target region (top) and miRNA (bottom) |                                    | Site type | Context++ score | Context++ score percentile | Weighted context++ score | Conserved branch length | PCT  | Predicted relative K <sub>D</sub> |
|---------------------------------------------------------------------------|------------------------------------|-----------|-----------------|----------------------------|--------------------------|-------------------------|------|-----------------------------------|
| Position 285-291 of ANGPTL4 3' UTR                                        | 5' ... AGUUGGGGACUCAGAGGGACCAC ... | 7mer-m8   | -0.39           | 95                         | -0.39                    | 4.416                   | 0.85 | -4.676                            |
| hsa-miR-133a-3p.1                                                         | 3' GUCGACCAACUCCCCUGGUU            |           |                 |                            |                          |                         |      |                                   |

Supplementary Figure 1. Predicted consequential pairing of target region of ANGPTL4 and miR-133a-3p.
